# Supplementary material for: Augmented curation of clinical notes from a massive EHR system reveals symptoms of impending COVID-19 diagnosis
Source: eLife journal article supplement (doi:10.7554/elife.58227), 2020-07-07
Supplement: supp [file elife-58227-supp-v1.zip]

|                                                                                                                                                                                                                                                                                                                                                    |                                                                                                                                                                                                                                                                                                     |
|----------------------------------------------------------------------------------------------------------------------------------------------------------------------------------------------------------------------------------------------------------------------------------------------------------------------------------------------------|-----------------------------------------------------------------------------------------------------------------------------------------------------------------------------------------------------------------------------------------------------------------------------------------------------|
| <p><b><u>Positive diagnosis (YES)</u></b></p> <p>"In regard to the patient's <b>history of atrial fibrillation</b>, she reports that she had occasional short episodes of a rapid rate that lasts a minute"</p> <p>"He <b>has severe tricuspid regurgitation</b> due to a partial flail tricuspid leaflet and a history of anemia."</p>            | <p><b><u>Negative diagnosis (NO)</u></b></p> <p>"She has <b>no history of chronic lung disease</b>, rheumatic fever, or endocarditis."</p> <p>"Although her right ventricle is compromised she is quite well compensated hemodynamically <b>without evidence of right ventricular failure.</b>"</p> |
| <p><b><u>Suspected Diagnosis (MAYBE)</u></b></p> <p>"However, this <b>could also be due to interstitial lung diseases</b> such as sarcoidosis, hypersensitivity pneumonitis, or Langerhans cell histiocytosis."</p> <p>"Because of the swelling I wonder about the <b>possibility of cor pulmonale</b> and underlying pulmonary hypertension."</p> | <p><b><u>Alternate Context (OTHER)</u></b></p> <p>"I have also sent him a copy of our recent paper on smoking-related <b>interstitial lung diseases.</b>"</p> <p>"She has no family history of <b>lung fibrosis</b> or other lung diseases."</p>                                                    |
