# Supplementary material for: Augmented curation of clinical notes from a massive EHR system reveals symptoms of impending COVID-19 diagnosis
Source: eLife journal article supplement (doi:10.7554/elife.58227), 2020-07-07
Supplement: supp [file elife-58227-supp-v1.zip]

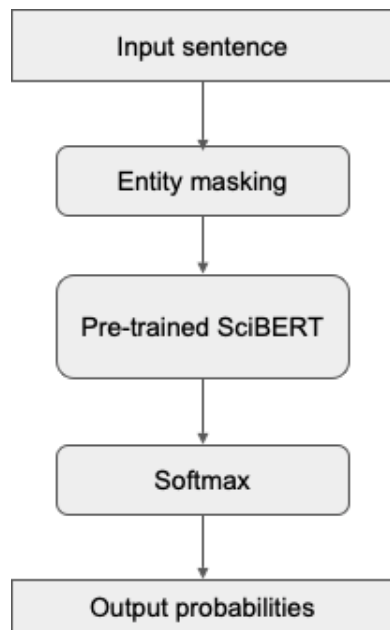

The patient seems to have pulmonary hypertension as evidenced by his electrocardiogram.

The patient seems to have @entitya\$ as evidenced by his electrocardiogram.

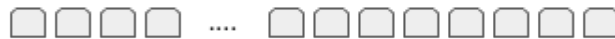

*768 dimension sentence embedding*

Yes=0.8      No=0.1      Maybe=0.1

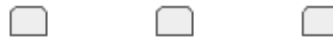

*N dimensional label predictions*

### Training Configuration

Learning rate: 3e-5

Warm up: 0.2

BERT model: SciBERT base cased

Max sequence length: 128

Optimizer: BERT Adam

Batch Size: 32

Number of Epochs: 4
